# Supplementary material
Source: HighWire-hosted journal article supplement (https://www.jneurosci.org/highwire/filestream/599627/field_highwire_adjunct_files/2/Figure_S3.pdf)

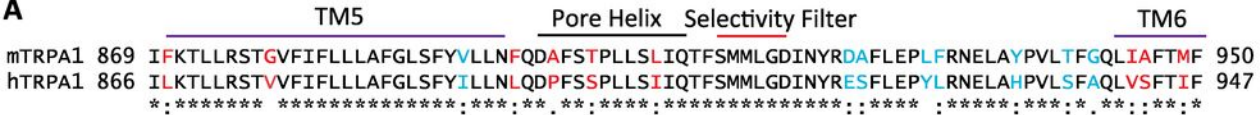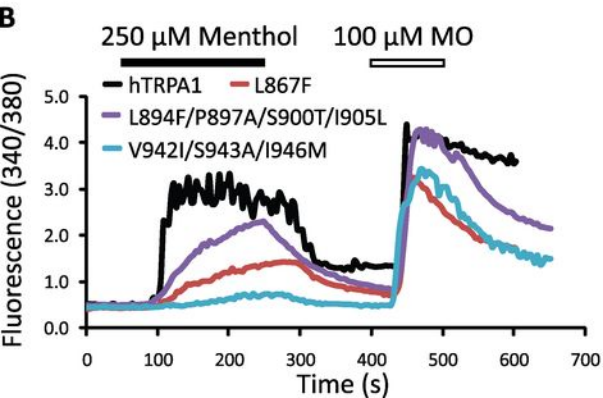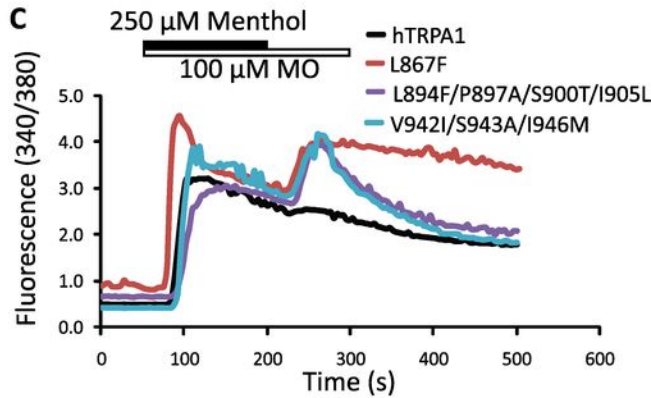

Supplement: Figure_S3.pdf [file Figure_S3.pdf]
